# Supplementary material
Source: publisher figshare collection journal article supplement (https://sage.figshare.com/ndownloader/files/14870222)
Supplement: Supplementary file 1 [file 14870222]

**Appendix 1**

**Working group members’ declarations of interests**

| **Name** | **Declaration of Interests** |
| --- | --- |
| Dr Alan Weiss | Provision of ECT in a public setting (Mater Hospital, New South Wales) and private setting (Lakeside Clinic, Warners Bay Private Hospital, New South Wales)  Author of *The Electroconvulsive Therapy Workbook: Clinical Applications* (2018) |
| Dr Salam Hussain | Provision of ECT in a public setting (Sir Charles Gairdner Hospital, Western Australia).  Member of the Chief Psychiatrist (Western Australia) working group to develop ECT Guidelines. |
| Dr Shanthi Sarma | Provision of ECT in a public setting only (Gold Coast University Hospital and Robina Hospital, Queensland) |
| Dr Bradley Ng | Provision of ECT in a public setting only (Robina Hospital, Queensland) |
| Professor John Tiller | Provision of ECT in a private setting (Albert Road Clinic and Epworth Camberwell, Victoria).  Co-editor of *Electroconvulsive Therapy: A Guide, Second Edition* (2013) |
| Dr Susan Waite | Provision of ECT in a public hospital only (The Queen Elizabeth Hospital, Adelaide, South Australia).  Member of committee to develop the South Australia ECT Guidelines for the Office of the Chief Psychiatrist. |
| Professor Colleen Loo | Provision of ECT in a private setting (Northside Clinic and Wesley Hospital, New South Wales).  Lecturer fee, International ECT Course 2018 (Course sponsored by the Mecta Company). |

**External contributors who provided comment on the guidelines***

Dr Sandip Anand; A/Professor Yoram Barak; Dr Richard Benjamin; Dr Suneel Chamoli; Dr Patrick Clarke; Dr Lorraine Davison; Dr Carol Dean; Dr Michelle Fryer; Professor Megan Galbally; Dr Shane Gill; Dr Bradleigh Hayhow; Mr Paul Inglis; Dr Nick Ingram; Dr Neil Jeyasingam; Dr Stephen Joshua; Dr John Lambe; Dr Samantha Loi; A/Professor Stephen Macfarlane; Dr Helen McGowan; Dr Barbara Matheson; Professor Ganapathi Murugesan; Professor Gordon Parker; A/Professor Saddichha Sahoo; Dr Brett Simpson; A/Professor Geoffrey Smith; A/Professor Marina Vamos; Dr Kurt Wendelborn

*Clinicians and consumers provided comment and feedback on a voluntary basis with no remuneration

**Membership of the Royal Australian and New Zealand College of Psychiatrists Section of Electroconvulsive Therapy and Neurostimulation Executive May 2016-May 2018**

Dr Alan Weiss (Chair), Dr Tibor Csizmadia, Dr Matthew Fasnacht, Professor Paul Fitzgerald, Dr Salam Hussain, Professor Colleen Loo, Dr Bradley Ng, Dr Shanthi Sarma, Professor John Tiller, Dr Susan Waite, Dr Melissa White
